# Supplementary material for: Diversity, composition, altitude, and seasonality of high-altitude windborne migrating mosquitoes in the Sahel: Implications for disease transmission
Source: Frontiers journal article supplement (doi:10.3389/fepid.2022.1001782), 2022-10-13
Supplement: Data_Sheet_1.pdf [file Data_Sheet_1.pdf]

1 Supplementary Materials:

2 Diversity, composition, altitude, and seasonality of high-altitude windborne migrating  
3 mosquitoes in the Sahel: Implications for disease transmission  
4

5 By Yaro et al. \* **Correspondence: Tovi Lehmann**, tlehmann@nih.gov  
6

7 Supplementary Results and Discussion

8 Because no mosquito was collected on 508 control panels that were raised to 40-100 m agl and  
9 immediately retrieved during launch and retrieval of the standard panels, these mosquitoes most probably  
10 were captured at altitude rather than near the ground (Huestis et al 2019, Florio et al. 2020). Mosquitoes  
11 are not captured on the control panels not only because of their short duration but also because launch  
12 stations were set in open fields away from humans, animals, and shelters and because most mosquito  
13 species are nocturnal, while launch and retrieval occurred during the day. As it was found in over 55% of  
14 the genera, i.e., six (or seven) of the 11 genera in Mali (Lehmann *et al.*, 2021; Wilkerson *et al.*, 2021):  
15 *Culex*, *Aedes*, *Anopheles*, *Mansonia*, *Mimomiya*, *Lutzia*, and *Eretmapodites* (Table S1), this migration  
16 modality is rather common in mosquitoes. Likewise, high proportion of the species in Mali engage in  
17 high-altitude migration because depending on whether species sampled by a single specimen are included,  
18 our estimate ranges between 31% and 47%. Yet, the actual proportion is expected to be higher because: i)  
19 473 of 2,576 mosquitoes (18.4%) were not assigned to species, and likely include several new species, ii)  
20 our aerial sampling was carried out in the Sahel, whereas other ecozones of Mali, which have distinct  
21 mosquito fauna have yet to be sampled, and iii) sampling at higher altitudes, e.g., 300-700 m agl, and  
22 during stronger winds (precluded given the helium balloons vulnerability to strong winds) would likely  
23 increase the number of specimens and the species diversity. The genus *Culex* predominated in the aerial  
24 collection both in terms of the number of mosquito specimens and the number of species (Table S1 and  
25 Fig. S1). Test of homogeneity among the three largest genera in this fraction revealed that *Culex* has  
26 exhibited higher than expected fraction of species in altitude given its total number of species in Mali  
27 (45%,  $P=0.048$ ,  $\chi^2_{[df=1]}= 3.9$ , binomial test). *Culex* has also had the largest number of specimens/species  
28 (99).

29 To ensure we do not include accidentally caught mosquitoes, we excluded species that were represented  
30 by a single specimen even though most probably are species that are less abundant in high altitude (see  
31

32 Figure S1. (Supp. Mat.). Mean number of specimen per species across genera and 95% confidence  
33 interval for  $N_{\text{species/genus}} > 7$ . Mean values are shown above bars.

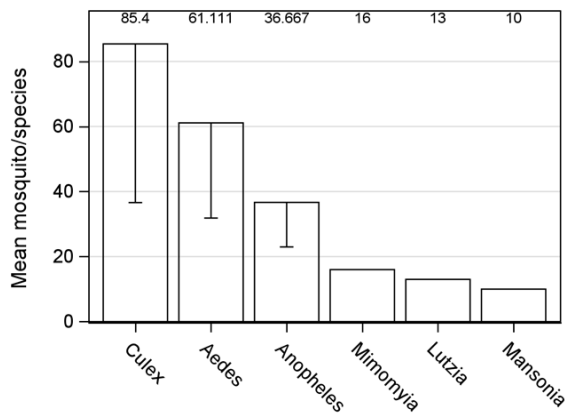

34

35

36 Table S1. Mosquito genera and species in high-altitude in the Sahel and their sample size

| Seq.No. | Genus            | Species                            | No. Specimens |
|---------|------------------|------------------------------------|---------------|
| 1       | <i>Aedes</i>     | <i>Ae. fowleri</i>                 | 238           |
| 2       | <i>Aedes</i>     | <i>Ae. argenteopunctatus</i>       | 139           |
| 3       | <i>Aedes</i>     | <i>Ae. quasiunivittatus</i>        | 138           |
| 4       | <i>Aedes</i>     | <i>Ae. mali sp. 2</i>              | 10            |
| 5       | <i>Aedes</i>     | <i>Ae. mcintoshi</i>               | 8             |
| 6       | <i>Aedes</i>     | <i>Ae. mali sp. 1</i>              | 7             |
| 7       | <i>Aedes</i>     | <i>Ae. hirsutus</i>                | 4             |
| 8       | <i>Aedes</i>     | <i>Ae. circumluteolus</i>          | 4             |
| 9       | <i>Aedes</i>     | <i>Ae. vittatus</i>                | 2             |
| 10      | <i>Aedes</i>     | <i>Ae. aegypti<sup>a</sup></i>     | 1             |
| 11      | <i>Aedes</i>     | <i>Ae. (Stg.) sp. 1</i>            | 1             |
| 12      | <i>Aedes</i>     | <i>Ae. ochraceus</i>               | 1             |
| 13      | <i>Aedes</i>     | <i>Ae. triseriatus</i>             | 1             |
| 14      | <i>Aedes</i>     | <i>Ae. mali sp. 3</i>              | 1             |
| 15      | <i>Aedes</i>     | <i>Ae. mali sp. 4</i>              | 1             |
| 16      | <i>Aedes</i>     | <i>Ae. mali sp. 6</i>              | 1             |
| 17      | <i>Aedes</i>     | <i>Aedes spp.</i>                  | 84            |
| 18      | <i>Anopheles</i> | <i>An. squamosus</i>               | 100           |
| 19      | <i>Anopheles</i> | <i>An. pharoensis</i>              | 41            |
| 20      | <i>Anopheles</i> | <i>An. coustani</i>                | 30            |
| 21      | <i>Anopheles</i> | <i>An. rufipes</i>                 | 24            |
| 22      | <i>Anopheles</i> | <i>An. coluzzii</i>                | 23            |
| 23      | <i>Anopheles</i> | <i>An. mali sp. 1</i>              | 2             |
| 24      | <i>Anopheles</i> | <i>An. gambiae</i>                 | 1             |
| 25      | <i>Anopheles</i> | <i>An. sp. nr concolor</i>         | 1             |
| 26      | <i>Anopheles</i> | <i>An. mali sp. 2</i>              | 1             |
| 27      | <i>Anopheles</i> | <i>An. cf. coustani 1 NFL-2015</i> | 1             |
| 28      | <i>Anopheles</i> | <i>Anopheles spp.</i>              | 12            |

|    |                      |                                |     |
|----|----------------------|--------------------------------|-----|
| 29 | <i>Culex</i>         | <i>Cx. perexiguus</i>          | 709 |
| 30 | <i>Culex</i>         | <i>Cx. cf. watti MAFP5.C5</i>  | 308 |
| 31 | <i>Culex</i>         | <i>Cx. antennatus</i>          | 86  |
| 32 | <i>Culex</i>         | <i>Cx. mali sp. 2</i>          | 36  |
| 33 | <i>Culex</i>         | <i>Cx. MBI-18</i>              | 36  |
| 34 | <i>Culex</i>         | <i>Cx. watti</i>               | 24  |
| 35 | <i>Culex</i>         | <i>Cx. nebulosus</i>           | 23  |
| 36 | <i>Culex</i>         | <i>Cx. bitaeniorhynchus</i>    | 18  |
| 37 | <i>Culex</i>         | <i>Cx. MBI-03</i>              | 18  |
| 38 | <i>Culex</i>         | <i>Cx. mali sp. 3</i>          | 10  |
| 39 | <i>Culex</i>         | <i>Cx. mali sp. 4</i>          | 3   |
| 40 | <i>Culex</i>         | <i>Cx. duttoni</i>             | 3   |
| 41 | <i>Culex</i>         | <i>Cx. poecilipes</i>          | 3   |
| 42 | <i>Culex</i>         | <i>Cx. annulioris</i>          | 2   |
| 43 | <i>Culex</i>         | <i>Cx. mali sp. 5</i>          | 2   |
| 44 | <i>Culex</i>         | <i>Cx. cinereus</i>            | 1   |
| 45 | <i>Culex</i>         | <i>Cx. decens</i>              | 1   |
| 46 | <i>Culex</i>         | <i>Cx. pipiens<sup>a</sup></i> | 1   |
| 47 | <i>Culex</i>         | <i>Cx. simpsoni</i>            | 1   |
| 48 | <i>Culex</i>         | <i>Culex spp.</i>              | 128 |
| 49 | <i>Eretmapodites</i> | <i>Er. intermedius</i>         | 1   |
| 50 | <i>Lutzia</i>        | <i>Lu. tigripes</i>            | 13  |
| 51 | <i>Mansonia</i>      | <i>Ma. uniformis</i>           | 10  |
| 52 | <i>Mimomyia</i>      | <i>Mi. mimomyiaformis</i>      | 16  |
| 53 | <i>Mimomyia</i>      | <i>Mi. mediolineata</i>        | 1   |

37

38 <sup>a</sup> It cannot entirely be rule out is that using colony specimens as positive controls may have  
39 resulted in erroneous identification. Although there is no evidence for this possibility, additional caution  
40 is needed when this species is being considered as a high-altitude migrant.

41

42 main text). Importantly, two species that appear in our aerial collection as singletons are especially  
43 important disease vectors, i.e., *Ae. aegypti*, *Ae. ochraceus*, *An. gambiae*, and *Cx. pipiens* (Table S1)  
44 (Braack *et al.*, 2018; Lehmann *et al.*, 2021; Wilkerson *et al.*, 2021). An additional concern, we cannot  
45 entirely rule out is that during the early phase of the molecular identification, certain specimens used as  
46 positive control might have resulted in possible laboratory error due to contamination. Although there is  
47 no evidence for this possibility, the inclusion of *Ae. aegypti*, *An. gambiae*, and *Cx. pipiens* from our  
48 laboratory as positive controls requires additional prudence. The *An. gambiae* specimen (Table S1) was  
49 separated and identified by another laboratory as previously described (Huestis *et al.*, 2019) prior to the  
50 processing of specimens in our own laboratory, precluding this possibility for that species identification.

51

52 Table S2. Female proportion across species ( $N \geq 4$ ) sorted by the proportion of females in the aerial  
 53 collection and the proportion of females exposed to vertebrate blood (see text).

| Genus     | Species                | Females | Female (%) | N (sex) | Exposed | Exposed (%) | N (gono.) |
|-----------|------------------------|---------|------------|---------|---------|-------------|-----------|
| Aedes     | Ae. hirsutus           | 2       | 50.0       | 4       | ND      | ND          | 1         |
| Lutzia    | Lu. tigripes           | 5       | 55.6       | 9       | ND      | ND          | 4         |
| Mimomyia  | Mi. mimomyiaformis     | 7       | 58.3       | 12      | 4       | 100         | 4         |
| Aedes     | Ae. mali sp. 2         | 5       | 62.5       | 8       | ND      | ND          | 3         |
| Culex     | Cx. mali sp. 2         | 19      | 70.4       | 27      | 14      | 93.3        | 15        |
| Culex     | Cx. nebulosus          | 12      | 75.0       | 16      | 9       | 100         | 9         |
| Culex     | Cx. bitaeniorhynchus   | 12      | 75.0       | 16      | 6       | 85.7        | 7         |
| Anopheles | An. squamosus          | 73      | 76.0       | 96      | 46      | 90.2        | 51        |
| Culex     | Cx. watti              | 13      | 76.5       | 17      | 8       | 100         | 8         |
| Anopheles | An. rufipes            | 16      | 80.0       | 20      | 12      | 92.3        | 13        |
| Culex     | Cx. MBI-03             | 12      | 80.0       | 15      | 4       | 80.1        | 5         |
| Culex     | Cx. mali sp. 3         | 8       | 80.0       | 10      | 3       | 50          | 6         |
| Culex     | Cx. cf. watti MAFP5.C5 | 210     | 81.7       | 257     | 122     | 94.6        | 129       |
| Culex     | Cx. antennatus         | 67      | 82.7       | 81      | 42      | 93.3        | 45        |
| Anopheles | An. pharoensis         | 34      | 82.9       | 41      | 31      | 100         | 31        |
| Culex     | Cx. perexiguus         | 512     | 83.5       | 613     | 312     | 94.3        | 331       |
| Anopheles | An. coustani           | 24      | 88.9       | 27      | 18      | 85.7        | 21        |
| Culex     | Cx. MBI-18             | 27      | 90.0       | 30      | 14      | 93.3        | 15        |
| Aedes     | Ae. argenteopunctatus  | 101     | 90.2       | 112     | 53      | 88.3        | 60        |
| Aedes     | Ae. quasiunivittatus   | 104     | 92.9       | 112     | 42      | 89.4        | 47        |
| Aedes     | Ae. fowleri            | 205     | 94.5       | 217     | 95      | 95.9        | 99        |
| Anopheles | An. coluzzii           | 21      | 95.5       | 22      | 16      | 88.9        | 18        |
| Aedes     | Ae. mcintoshi          | 5       | 100.0      | 5       | ND      | ND          | 3         |
| Aedes     | Ae. mali sp. 1         | 6       | 100.0      | 6       | 3       | 60.1        | 5         |
| Aedes     | Ae. circumluteolus     | 4       | 100.0      | 4       | ND      | ND          | 2         |
| Mansonia  | Ma. uniformis          | 9       | 100.0      | 9       | 5       | 100         | 5         |

54

55

56 Sensitivity analysis was used to evaluate the effect of the uncertainty (and natural variance) in the relative  
 57 difference in likelihood of transmission by primary and secondary vectors on our estimates of importance  
 58 of windborne spread of different pathogens and on the relative roles of different vectors on overall  
 59 windborne spread of pathogens (see Main Text). Accordingly, we compared the correlations between our  
 60 best estimates of windborne spread depicted in Figure 4. with those based on high and low values that  
 61 span the range of the difference between primary and secondary transmission ratios. We considered an  
 62 infection ratio (approximately equivalent to transmission contribution ratio) of 4:1 as the minimum  
 63 differential ratio in keeping with the definition of primary and secondary vectors because similar size  
 64 difference may also be found between two primary vectors in which one contributes 75% and the other  
 65 19%, whereas additional three or more secondary vectors contribute less than the remaining 6%. On the  
 66 other hand, we consider a ratio of 1:0.0025 among the highest differential rate (in their infection rates)  
 67 because typical sample size per species in most studies ranges between a few hundreds and a few tens of

68 thousands and the infection rate of the primary vector(s) are near 1% so a ratio of 1:0.0025 implies  
 69 finding mere 2-3 infected mosquitoes of a sample of 100,000, which very few studies have ever reached  
 70 not to mention exceeded. Our sensitivity analysis reveals that the estimates of windborne spread based on  
 71 the mid-range (1:0.1) were highly correlated with those in the extreme low ( $r=0.99$ ,  $P<0.0001$ ,  $N=53$ ) and  
 72 high of the range ( $r=0.979$ ,  $P<0.0001$ ,  $N=53$ ). When summed over pathogens or mosquito species, high  
 73 correlations persisted ( $r>0.95$ ,  $P<0.0001$ ,  $N=14$ , Fig. S1).

74 [Table S3. Please see separate file in Supplementary Materials.]

75

76 Figure S2. Sensitivity of estimates of the relative contribution of windborne transport by different  
 77 mosquito species (a) and pathogens (b) to the uncertainty in transmission likelihood by primary and  
 78 secondary vectors (see main text). The relationship between estimates based on the “mid-range”  
 79 difference between primary and secondary vectors (1:0.1 X-axis), and the lowest difference (1:0.25 Y-  
 80 axis, top) and highest difference (1:0.0025 Y-axis, bottom) are shown. Values close to the diagonal  
 81 indicate low sensitivity to different weights or similar patterns across weights. Linear regression between  
 82 estimators are shown (blue) and observations are labeled by abbreviated vector species and pathogen  
 83 acronym. Pearson correlation coefficients are shown in top left corner of each panel.

84

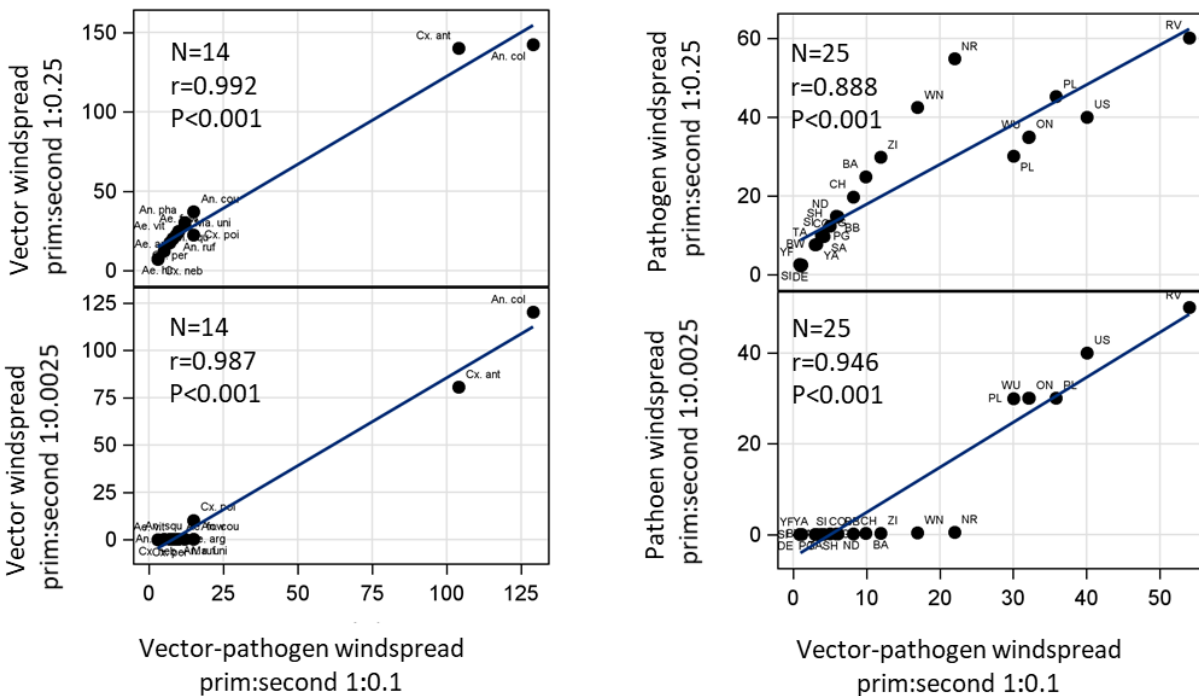

85

86

87 **Literature cited**

88

89 Braack, L., Gouveia De Almeida, A.P., Cornel, A.J., Swanepoel, R. & Jager, C. De. (2018) Mosquito-borne arboviruses of

- 90 African origin: Review of key viruses and vectors. *Parasites and Vectors*, **11**, 29.
- 91 Huestis, D.L., Dao, A., Diallo, M., Sanogo, Z.L., Samake, D., Yaro, A.S., *et al.* (2019) Windborne long-distance migration of  
92 malaria mosquitoes in the Sahel. *Nature*, **574**, 404–408.
- 93 Lehmann, T., Kouam, C., Woo, J., Diallo, M., Wilkerson, R. & Linton, Y.-M. (2021) The African mosquito-borne diseasesome:  
94 Geographical patterns and range expansion I. *bioRxiv*.
- 95 Wilkerson, R.C., Linton, Y.-M. & Strickman, D. (2021) *Mosquitoes of the World*. Vol. 1 & 2. Johns Hopkins University Press,  
96 Baltimore.
- 97
