# Supplementary material for: Diversity, composition, altitude, and seasonality of high-altitude windborne migrating mosquitoes in the Sahel: Implications for disease transmission
Source: Front Epidemiol. 2022 Oct 13;2:1001782. doi: 10.3389/fepid.2022.1001782 (PMC10910920; doi:10.3389/fepid.2022.1001782)
Supplement: Supplementary file 2 [file Table_1.xlsx]

## Sheet: Definitions&Footnotes
	DEFINITIONS & NOTES
Variable/Term	Definitions and clarifications
Genus	Mosquito genus
MoSpecies	Mosquito species
Pathogen	Pathogen species
PathoAcronym	Acronym of pathogen name based on scientific convention if available (e.g., virus acronyms) or on our nomenclature
VecTransRegion	African region (countries) where transmission by this vector was implicated (evidence for implication is described in other fields)
VectorImport	Primary or Secondary (or None -to indicate some evidence contradicting implication of the species as a vector) reflecting terminology used by authors or inferred based on relative role in total transmission in that region in relation to other mosquito species
VectorImportEvidence	basis for implication as vector: WIn[isolation of pathogen from wild vector from whole body or midgut], WIs[isolation of infectious pathogen from wild vector from salivary/saliva], WIL[Isolation of pathogen from wild vector from legs], WIth[Isolation of pathogen for Thorax or Thorax&Head] WIc[Detection of pathogen circumsporozoites in wild vector], LF[lab experiment + feeds on relevant hosts] TF[…
Geographic Classifications	Included countries (regions)
Northern Africa	Algeria, Egypt, Libya, Morocco, Tunisia, Western Sahara
East Africa	Burundi, Djibouti, Eritrea, Ethiopia, Kenya, Rwanda, Somalia, Sudan & South Sudan, Tanzania, Uganda
West Africa	Benin, Burkina Faso, Gambia, Ghana, Guinea, Guinea Bissau, Ivory Coast, Liberia, Mali, Mauritania, Senegal, Sierra Leone, Togo
Southern Africa	Angola, Botswana, Malawi, Mozambique, Namibia, South Africa, Zambia, Zimbabwe
Central Africa	Cameroon, Central African Republic (CAR), Congo, Democratic Republic of the Congo (DRC), Equatorial Guinea, Gabon, Niger, Nigeria
Far Islands	Comoros, Cape Verde, Madagascar, São Tomé and Príncipe, Seychelles, Mauritius
subSaharan Africa	East Africa, West Africa, Southern Africa, Central Africa
All Africa	East Africa, West Africa, Southern Africa, Central Africa, Northern Africa
	For additional explanations, please see Lehmann et al. 2021. bioRxiv(Preprint): https://www.biorxiv.org/content/10.1101/2021.12.21.473756v1.article-metrics

## Sheet: AfroMosiPathogens
				Table S3. Reported mosquito vectors of vertebrate pathogens in West Africa [with citations]
Genus	MoSpecies	Pathogen	PathoAcronym	VecTransRegion	VectorImport	VectorImportEvidence
Aedes	Ae. argenteopunctatus	Shokwe virus	SHOV	WestAfrica(Senegal) [1,16]	Secondary [16]	WIn [16]
Aedes	Ae. argenteopunctatus	Ngari virus	NRIV	WestAfrica(Senegal) [329]	Secondary [329]	WIn [329]
Aedes	Ae. fowleri	Bagaza virus	BAGV	WestAfrica(Senegal)[172]	Secondary [172]	WIn[172]
Aedes	Ae. fowleri	Zika virus	ZIKV	WestAfrica(Senegal) [85,165]	Secondary [128]	WIn [128]
Aedes	Ae. hirsutus	Zika virus	ZIKV	WestAfrica(senegal) [84, 127]	Secondary [127]	WIn [127, 128]
Aedes	Ae. hirsutus	Chikungunya virus	CHIKV	WestAfrica(senegal) [79]	Secondary [79]	WIn [79]
Aedes	Ae. hirsutus	Ngari virus	NRIV	WestAfrica(Senegal) [329]	Secondary [329]	WIn [329]
Aedes	Ae. ochraceus	Rift Valley fever virus	RVFV	WestAfrica(Senegal, Mauritania) [168]	Secondary [174]	WIn Epi [1002]
Aedes	Ae. vittatus	Yellow fever virus	YFV	WestAfrica(Senegal, Ivory Cost),[321, 143]	Secondary[2, 321, 143]	WIn [321]
Aedes	Ae. vittatus	Zika virus	ZIKV	WestAfrica(Senegal, Nigeria, Ivory Coast)[165, 84, 127, 321]	Secondary [127, 321]	Win [127, 165]
Aedes	Ae. vittatus	Chikungunya virus	CHIKV	WestAfrica(Senegal)[321]	Secondary: Bridge [79, 321]	WIn, LF[321]
Aedes	Ae. vittatus	Pongola virus	PGAV	WestAfrica (Senegal) [16]	Secondary [16]	WIn [16]
Aedes	Ae. vittatus	Ngari virus	NRIV	WestAfrica (Senegal) [1, 16]	Secondary [1, 16]	WIn [16]
Aedes	Ae. vittatus	Simbu virus	SIMV	WestAfrica(Senegal)[16]	Secondary [16]	WIn [16]
Aedes	Ae. vittatus	Babanki virus	BBKV	WestAfrica (Senegal) [1]	Secondary [2]	WIn [1]
Aedes	Ae. vittatus	Dengue virus	DENV	WestAfrica(Senegal, Ivory Coast)[321]	Secondary [321]	WIn, LF[321]
Anopheles	An. coluzzii	Plasmodium vivax	PLVIX	WestAfrica[169]	Primary [169]	WIth [320]
Anopheles	An. coluzzii	Plasmodium falciparum	PLFLC	WestAfrica[169]	Primary [169]	WIth [319]
Anopheles	An. coluzzii	Wuchereria bancrofti	WUBNC	WestAfrica[113, 114, 169]	Primary[113, 114]	WIn, WIs [131]
Anopheles	An. coluzzii	Bwamba virus	BWAV	WestAfrica(Senegal) [16]	Secondary [16]	WIn [16]
Anopheles	An. coluzzii	O'Nyong-Nyong virus	ONNV	WestAfrica [130]	Primary [130]	WIn [151]
Anopheles	An. coluzzii	Ngari virus	NRIV	WestAfrica(Burkina Faso, Senegal) [89]	Secondary [89]	WIn, LF [89]
Anopheles	An. coluzzii	Tataguine virus	TATV	WestAfrica(Burkina Faso, Senegal)[16, 143,189]	Secondary [189]	WIn [143]
Anopheles	An. coustani	Chikungunya virus	CHIKV	WestAfrica(senegal) [79]	Secondary [79]	WIn [79]
Anopheles	An. coustani	Plasmodium falciparum	PLFLC	WestAfrica(Burkina Faso) [319]	Secondary [319]	WIn [319]
Anopheles	An. coustani	Zika virus	ZIKV	WestAfrica(Senegal) [84, 127]	Secondary [127]	WIn [127]
Anopheles	An. coustani	Pongola virus	PGAV	WestAfrica(Ivory Coast) [16]	Secondary [16]	WIn [16]
Anopheles	An. coustani	Ngari virus	NRIV	WestAfrica(Senegal) [329]	Secondary [329]	WIn [329]
Anopheles	An. pharoensis	Rift Valley fever virus	RVFV	WestAfrica(Mauritania)[81, 8, 327]	secondary [327]	WIn [81, 327]
Anopheles	An. pharoensis	Ngari virus	NRIV	WestAfrica(Senegal) [58, 8]	Secondary [58]	WIn [58]
Anopheles	An. pharoensis	Bangui virus	BGIV	WestAfrica(Senegal) [8]	Secondary [8]	WIn [8]
Anopheles	An. rufipes	West Nile virus	WNV	WestAfrica(Senegal) [83]	Secondary [83]	WIn [83]
Anopheles	An. rufipes	Ndumu virus	NDUV	WestAfrica(Senegal) [83]	Secondary [83]	WIn [83]
Anopheles	An. rufipes	Plasmodium falciparum	PLFLC	subSaharanAfrica [141, 319]	Secondary [141]	WIc [141]
Anopheles	An. squamosus	Babanki virus	BBKV	WestAfrica(Senegal) [317]	Secondary [317]	WIn [317]
Culex	Cx. antennatus	Sango virus	SANV	WestAfrica(Senegal) [83]	Secondary [83]	WIn [83]
Culex	Cx. antennatus	Bagaza virus	BAGV	WestAfrica(Senegal) [83]	Secondary [83]	WIn [83]
Culex	Cx. antennatus	Usutu virus	USUV	WestAfrica(Senegal) [83]	Primary [83]	WIn [83]
Culex	Cx. antennatus	West Nile virus	WNV	WestAfrica(Senegal)[83]	Secondary [143]	WIn [83]
Culex	Cx. antennatus	Corriparta virus	CORV	WestAfrica(Senegal)[83])	Secondary [83]	WIn[83]
Culex	Cx. antennatus	Sindbis virus	SINV	WestAfrica(Senegal) [83]	Secondary [83]	WIn [83]
Culex	Cx. antennatus	Rift Valley fever virus	RVFV	WestAfrica(Mauritania) [143, 168, 1002]	Primary [168]	WIn Epi [1002] LF[168]
Culex	Cx. antennatus	Ngari virus	NRIV	WestAfrica(Senegal) [329]	Secondary [329]	WIn [329]
Culex	Cx. nebulosus	Yaounde virus	YAOV	WestAfrica(Ghana)[2]	Secondary [2]	WIn [2]
Culex	Cx. perexiguus	West Nile virus	WNV	WestAfrica(Senegal) [328]	Secondary[328]	WIn[328]
Culex	Cx. poicilipes	Ndumu virus	NDUV	WestAfrica(Senegal) [83]	Secondary [83]	WIn [83]
Culex	Cx. poicilipes	Chikungunya virus	CHIKV	WestAfrica(Senegal) [79]	Secondary [79, 325]	WIn [79]
Culex	Cx. poicilipes	West Nile virus	WNV	WestAfrica(senegal) [61, 83, 312]	Secondary [243]	WIn [83, 312]
Culex	Cx. poicilipes	Rift Valley fever virus	RVFV	WestAfrica(Senegal, Mauritania) [172, 80, 1002,168, 169, 57]	Primary [172, 80, 83]	WIn[172, 1002, 169] LF[168]
Culex	Cx. poicilipes	Bagaza virus	BAGV	WestAfrica(Senegal, Mauritania)[172]	Secondary [172]	WIn [172]
Culex	Cx. poicilipes	Ngari virus	NRIV	WestAfrica(Senegal) [329]	Secondary [329]	WIn [329]
Mansonia	Ma. uniformis	Chikungunya virus	CHIKV	WestAfrica(Senegal) [79]	Secondary [79]	WIn [79]
Mansonia	Ma. uniformis	Ndumu virus	NDUV	WestAfrica(Senegal) [169, 16, 1, 83, 12]	Secondary [83, 169]	WIn [169]
Mansonia	Ma. uniformis	Wuchereria bancrofti	WUBNC	WestAfrica(Ghana, Guinea) [12, 110, 298]	secondary [110]	WIth, WIL, WIs [110]
Mansonia	Ma. uniformis	Zika virus	ZIKV	WestAfrica(Senegal) [85,127, 165]	Secondary [85]	WIn[165]
Mansonia	Ma. uniformis	O'Nyong-Nyong virus	ONNV	WestAfrica[2, 1, 12]	secondary[2]	WIn [2]
Mansonia	Ma. uniformis	West Nile virus	WNV	WestAfrica(Senegal)[172,83]	Secondary [172]	WIn[172,83]

## Sheet: References
	References cited (in main table)
RefNo.	Author [Authors (up to 6 and then et al.), Year, Title, Journal info]	Link to reference or information on source
1	Arbovirus Catalog. Centers for Disease Control and Prevention. Available at: https://wwwn.cdc.gov/Arbocat/Default.aspx.	https://wwwn.cdc.gov/arbocat/VirusBrowser.aspx
2	Braack L, Gouveia de Almeida AP, Cornel AJ, Swanepoel R, de Jager C. 2018. Mosquito-borne arboviruses of African origin: review of key viruses and vectors. Parasites & Vectors, 11: 29.	https://parasitesandvectors.biomedcentral.com/articles/10.1186/s13071-017-2559-9
8	Minkeu FN, Vernick KD. 2018. A systematic review of the natural virome of Anopheles mosquitoes. Viruses. 10(5): 222.	https://www.mdpi.com/1999-4915/10/5/222/htm
12	Walter Reed Biosystematics Unit Database. WRBU. Available at: https://www.wrbu.si.edu	https://www.wrbu.si.edu/
16	Karabatsos N. 1985. International Catalogue of Arboviruses, including certain other viruses of vertabrates. 3rd ed. American Society for Tropical Medicine and Hygiene for the Subcommittee on Information Exchange of the American Committee on Arthro born viruses.	Book
58	Dutuze MF, Nzayirambaho M, Mores CN, Christofferson RC. 2018. A Review of Bunyamwera, Batai, and Ngari Viruses: Understudied Orthobunyaviruses With Potential One Health Implications. Frontiers in Veterinary Science. 5: 69.	https://www.ncbi.nlm.nih.gov/pmc/articles/PMC5906542/
61	Sule WF, Oluwayelu DO, Hernandez-Triana LM, Fooks AR, Venter M, Johnson N. 2018. Epidemiology and ecology of West Nile virus in sub-Saharan Africa. Parasites & Vectors. 11: 414.	https://parasitesandvectors.biomedcentral.com/articles/10.1186/s13071-018-2998-y
79	Diallo D, Sall AA, Buenemann M, Chen R, Faye O, Diagne CT, et al. 2012. Landscape Ecology of Sylvatic Chikungunya Virus and Mosquito Vectors in Southeastern Senegal. PLoS Neglected Tropical Diseases. 6(6): e1649.	https://journals.plos.org/plosntds/article?id=10.1371/journal.pntd.0001649#abstract0
81	Linthicum KJ, Davies FG, Kairo A, Bailey CL. 2009. Rift Valley fever virus (family Bunyaviridae, genus Phlebovirus). Isolations from Diptera collected during an inter-epizootic period in Kenya. Epidemiology & Infection. 9(1): 197-209.	https://doi.org/10.1017/S0022172400062434
83	Ndiaye EH, Diallo D, Fall G, Ba Y, Faye O, Dia I, et al. 2018. Arboviruses isolated from the Barkedji mosquito-based surveillance system, 2012-2013. BMC infectious diseases. 18: 642.	https://bmcinfectdis.biomedcentral.com/articles/10.1186/s12879-018-3538-2#Tab4
84	Boyer S, Calvez E, Chouin-Carneiro T, Diallo D, Failloux A. 2018. An overview of mosquito vectors of Zika virus. Microbes and Infection Elsevier. 20(11-12): 646-660.	https://reader.elsevier.com/reader/sd/pii/S128645791830039X?token=1831E4CEB6B9A228B7898F6A017551F7B1A56115083E41E4B7E9543B53F40C0D6466D99D8126611FFD550DF14A2DC482
85	Epelboin Y, Talaga S, Epelboin L, Dusfour I. 2017. Zika virus: An updated review of competent or naturally infected mosquitoes. PLoS Negleted Tropical Diseases. 11(11): e0005933.	https://journals.plos.org/plosntds/article?id=10.1371/journal.pntd.0005933
89	Odhiambo C, Venter M, Chepkorir E, Mbaika S, Lutomiah J, Swanepoel R et al. 2014. Vector Competence of Selected Mosquito Species in Kenya for Ngari and Bunyamwera Viruses. J Med Ento. 51(6): 1248-1253	https://doi.org/10.1603/ME14063
110	Ughasi J, Bekard HE, Coulibaly M, Adabie-Gomez D, Gyapong J, Appawu M, et al. 2012. Mansonia africana and Mansonia uniformis are Vectors in the transmission of Wuchereria bancrofti lymphatic filariasis in Ghana. Parasites & Vectors. 5: 89.	https://www.ncbi.nlm.nih.gov/pmc/articles/PMC3419659/
113	Yokoly FN, Zahouli JBZ, Meite A, Opoku M, Kouassi BL, de Souza DK, et al. Low transmission of Wuchereria bancrofti in cross-border districts of Côte d’Ivoire: A great step towards lymphatic filariasis elimination in West Africa. PLoS One. 15(4): e0231541.	https://journals.plos.org/plosone/article?id=10.1371/journal.pone.0231541
114	Dunyo SK, Appawu M, Nkrumah FK, Baffoe-Wilmot A, Pedersen EM, Simonsen PE. 1996. Lymphatic filariasis on the coast of Ghana. Transactions of the Royal Society of Tropical Medicine & Hygiene. 90(6): 634-638.	https://academic.oup.com/trstmh/article-abstract/90/6/634/1924360?redirectedFrom=PDF&casa_token=FOHA3Myrnz8AAAAA:ShWEaxaCLgmM2cXfTUqREPiByf7BypBzQEGCh3VuPefHQIwbAOirWJ52DTsva4cepHljBEaGaWOvGg
127	Diallo D, Sall AA, Diagne CT, Faye O, Faye O, Ba Y, et al. 2011. Zika Virus Emergence in Mosquitoes in Southeastern Senegal, 2011. PLoS One. 9(10): e109442.	https://journals.plos.org/plosone/article?id=10.1371/journal.pone.0109442
128	Althouse BM, Hanley KA, Diallo M, Sall AA, Ba Y, Faye O, et al. 2015. Impact of Climate and Mosquito Vector Abundance on Sylvatic Arbovirus Circulation Dynamics in Senegal. American Journal of Tropical Medicine and Hygiene. 92(1): 88-97.	http://www.ajtmh.org/content/journals/10.4269/ajtmh.13-0617
130	Rezza G, Chen R, Weaver SC. 2017. O’nyong-nyong fever: a neglected mosquito-borne viral disease. Pathogens and Global Health. 111(6): 271-275.	https://www.ncbi.nlm.nih.gov/pmc/articles/PMC5694854/
131	Lenhart A, Eigege A, Kal A, Pam D, Miri ES, Gerlong G, et al. 2007. Contributions of different mosquito species to the transmission of lymphatic filariasis in central Nigeria: implications for monitoring infection by PCR in mosquito pools. Filaria Journal. 6:14.	https://filariajournal.biomedcentral.com/articles/10.1186/1475-2883-6-14#Tab1
141	Awono-Ambene PH, Etang J, Antonio-Nkondijo C, Eyisap WE, Piameu MC, Mandeng ES, et al. 2018. The bionomics of the malaria vector Anopheles rufipes Gough, 1910 and its susceptibility to deltamethrin insecticide in North Cameroon. Parasites & Vectors. 11: 253.	https://parasitesandvectors.biomedcentral.com/articles/10.1186/s13071-018-2809-5#Tab3
143	Ashford RW, et al.The Encyclopedia of Arthropods-transmitted Infections. 2001. Service MW, advisors (eds). CABI Publishing. 2001	Book
151	Williams MC, Woodall JP, Corbet PS, Gillett JD. et al. 1965. O'nyong-nyong fever: An epidemic virus disease in East Africa VIII. Virus isolations from anopheles mosquitoes. Transactions of the Royal Society of Tropical Medicine and Hygiene. 59(3): 300-306.	https://academic.oup.com/trstmh/article/59/3/300/1931717
165	Haddow et al. 2012. Genetic Characterization of Zika Virus Strains: Geographic Expansion of the Asian Lineage	https://www.ncbi.nlm.nih.gov/pmc/articles/PMC3289602/
168	Tantely LM, Boyer S, Fontenille D. 2015. A Review of Mosquitoes Associated with Rift Valley Fever Virus in Madagascar. American Journal of Tropical Medicine and Hygiene. 92(4): 722-729.	https://www.ncbi.nlm.nih.gov/pmc/articles/PMC4385764/
169	Karungu S, Atoni E, Ogalo J, Mwaliko C, Agwanda B, Yuan Z, et al. 2019. Mosquitoes of Etiological Concern in Kenya and Possible Control Strategies. Insects. 10(6): 173.	https://www.ncbi.nlm.nih.gov/pmc/articles/PMC6627689/#:~:text=The%20main%20mosquito%20species%20associated,as%20a%20result%20of%20outbreaks
172	Diallo M, Nabeth P, Ba K, Sall AA, Ba Y, Mondo M, et al. 2005. Mosquito vectors of the 1998–1999 outbreak of Rift Valley Fever and other arboviruses (Bagaza, Sanar, Wesselsbron and West Nile) in Mauritania and Senegal. Medical and Veterinary Entomology, 19(2): 119-126.	https://onlinelibrary.wiley.com/doi/full/10.1111/j.0269-283X.2005.00564.x
174	Fontenille D, Traore-Lamizana M, Diallo M, Thonnon J, Digoutte JP, Zeller HG. 1998. New Vectors of Rift Valley Fever in West Africa. Emerging Infectious Diseases. 4: 2.	https://www.ncbi.nlm.nih.gov/pmc/articles/PMC2640145/pdf/9621201.pdf
189	Salaun JJ, Rickenbach A, Bres P, Brottes H, Germain M, Eouzan JP, et al. 1969. Arboviruses Isolated from Cameroon. Bulletin of the World Health Organization. 41(2): 233-241.	https://www.ncbi.nlm.nih.gov/pmc/articles/PMC2427423/
298	Brengues J, Subra R, Mouchet J, Nelson GS. 1968. La transmission de Wuchereria bancrofti Cobbold en Afrique Ocidentale. Bulletin of the World Health Organization. 38: 595-608.	https://www.ncbi.nlm.nih.gov/pmc/articles/PMC2554536/pdf/bullwho00237-0099.pdf
312	Traore-Lamizana M, Zeller H G , Mondo M ,Hervy J P , Adam F , Digoutte J P . 1994. Isolations of West Nile and Bagaza viruses from mosquitoes (Diptera: Culicidae) in central Senegal (Ferlo). J Med. Entomology. 31(6):934-8	https://doi.org/10.1093/jmedent/31.6.934
317	Traoré-lamizana M, Fontenille T, Diallo M, Bâ Y, Zeller H, Mondo M et al. 2001. Arbovirus Surveillance from 1990 to 1995 in the Barkedji Area (Ferlo) of Senegal, a Possible Natural Focus of Rift Valley Fever Virus. J Med Ento. 38(4); 480-492	https://doi.org/10.1603/0022-2585-38.4.480
319	Tabue R, Awono-Ambene P, Etang J, Atangana J, Antonio-Nkondjio C, Toto J et al. 2017. Role of Anopheles (Cellia) rufipes (Gough, 1910) and other local anophelines in human malaria transmission in the northern savannah of Cameroon: a cross-sectional survey. Parasites and Vectors.	https://parasitesandvectors.biomedcentral.com/articles/10.1186/s13071-016-1933-3
320	Kibret S, Alemu Y, Boelee E, Tekie H, Alemu D, Petros B et al. 2009. The impact of a small-scale irrigation scheme on malaria transmission in Ziway area, Central Ethiopia.	https://doi.org/10.1111/j.1365-3156.2009.02423.x
321	Sudeep, Shill. 2017. Aedes vittatus (Bigot) mosquito: An emerging threat to public health. J. Vector Borne Diseases 54: 295-300	https://www.jvbd.org/article.asp?issn=0972-9062;year=2017;volume=54;issue=4;spage=295;epage=300;aulast=Sudeep#ref16
327	Stoek F, Barry Y , Ba A, Schulz A, Rissmann M, Wylezich C et al. 2022. Mosquito survey in Mauritania: Detection of Rift Valley fever virus and dengue virus and the determination of feeding patterns. Plos Neg Trop Dis.	https://doi.org/10.1371/journal.pntd.0010203
328	Benbetka S, Hachid A, Benallal KE, Benbetka C, Khaldi A, Bitam I, Harrat Z. 2018. First field evidence infection of Culex perexiguus by West Nile virus in Sahara Oasis of Algeria. J Vector Borne Dis. 55(4):305-309.	https://www.jvbd.org/article.asp?issn=0972-9062;year=2018;volume=55;issue=4;spage=305;epage=309;aulast=Benbetka
329	Zeller G, Diallo M, Angel G, Traore-Laminana M, Thonnon J, Digoutte JP et al. 1996. LE VIRUS NGARI (BUNYAVIRIDAE : BUNYAVXRUS) Premiers isolements chez l’homme au Sénégal, nouveaux vecteurs culicidiens, le point sur son épidémiologie. Bull Soc Path Ex. 89:12-16	https://horizon.documentation.ird.fr/exl-doc/pleins_textes/pleins_textes_6/b_fdi_45-46/010006512.pdf
1002	Lemine AMM, Lemrabott MAO, Ebou MH, Lekweiry KM, Salem MSOA, Brahim KO, et al. 2017. Mosquitoes (Diptera: Culicidae) in Mauritania: a review of their biodiversity, distribution and medical importance. Parasites & Vectors. 10: 35.	https://dx.doi.org/10.1186%2Fs13071-017-1978-y
NOTE:	Reference numbers match our database
